# Supplementary material
Source: PubMed Central journal article supplement (PMC5566522)
Supplement: 10.1074_M117.783951_jbc.M117.783951-1.pdf [file 10.1074_M117.783951_jbc.M117.783951-1.pdf]

## Identification of Oxidative Modifications of Hemopexin and Their Predicted Physiological Relevance

Peter Hahl,<sup>1</sup>Rachel Hunt, Edward S. Bjes, Andrew Skaff, J. Andrew Keightley and Ann Smith

From the Department of Molecular Biology & Biochemistry, School of Biological Sciences, University of Missouri-Kansas City, 5007 Rockhill Road, Kansas City, MO 64110-2239, USA. <sup>1</sup>Current address: Kansas Bureau of Investigation, 7250 State Avenue, Kansas City, Kansas 66112-3003

To whom correspondence should be addressed: Prof. Ann Smith, PhD. Department of Molecular Biology & Biochemistry, School of Biological Sciences, University of Missouri-Kansas City, 5007 Rockhill Road, Kansas City, Missouri 64110-2239, USA, Telephone: (816) 235-2265; Fax: (816) 235-5556; E-mail: smithan@umkc.edu

**Supplemental Material**

1. Data Availability
2. Supplemental Table I
3. Supplemental Figure 1
4. Supplemental Figure 2
5. Supplemental Figure 3
6. Supplemental Figure 4

**Data Availability**

Refer to web versions in Pub Med Central for supplementary material. The MS proteomics data have been deposited in the Mass Spectrometry Interactive Virtual Environment (MassIVE) with a data set identifier (<ftp://MSV000080394@massive.ucsd.edu>). MassIVE is a community resource that was developed by an NIH-funded Center for Computational Mass Spectrometry at the University of California, San Diego, to promote the global and free exchange of MS data. The RAW data files and the MASCOT search file names for the MS/MS SRM analyses of peptides derived from human, rabbit and rat hemopexin deposited in MassIVE are summarized in Supplementary Table I.

**Supplemental Table I**

| Table or Figure | Species of Hemopexin/#state |           | Deposited .RAW and .DAT MASCOT search files | scan# | Peptide                                                        |
|-----------------|-----------------------------|-----------|---------------------------------------------|-------|----------------------------------------------------------------|
| Table I         | Human                       | native    | HuHPXTIF1FS3Yn199                           | 2173  | <sup>198</sup> YY <sup>n</sup> CFQGNQFLR <sup>208</sup>        |
|                 | Rabbit                      | native    | RbtHPXTIFS1Yn201                            | 3037  | <sup>200</sup> YY <sup>n</sup> CFQGNQFLR <sup>210</sup>        |
|                 | Rat                         | native    | RatHPXTIFS2Yn118                            | 711   | <sup>117</sup> YY <sup>n</sup> CFQGNK <sup>204</sup>           |
| Table II        | Rabbit                      | native    | RbtHPXTIIN                                  | 2592  | <sup>118</sup> VWVY <sup>n</sup> TSEK <sup>125</sup>           |
|                 |                             |           |                                             | 2715  | <sup>228</sup> DY <sup>n</sup> FLSCPGR <sup>236</sup>          |
|                 |                             |           |                                             | 2720  | <sup>316</sup> LY <sup>n</sup> LIQDTK <sup>323</sup>           |
|                 |                             |           |                                             | 2837  | <sup>324</sup> VY <sup>n</sup> VFLTK <sup>330</sup>            |
| Table III       | Rabbit                      | HOCl 1:10 | RbtHPXTIITIVHOCl_c                          | 975   | <sup>118</sup> VW <sup>ox</sup> VYTSEK <sup>125</sup>          |
|                 |                             | HOCl 1:10 | RbtHPXTIITIVHOCl_c                          | 3297  | <sup>211</sup> FNPVSGEVPPGY <sup>Cl</sup> PLDVR <sup>227</sup> |

*Oxidative modifications of hemopexin*

|                 |                              |                    |                       |      |                                                                   |
|-----------------|------------------------------|--------------------|-----------------------|------|-------------------------------------------------------------------|
|                 |                              | HOCI 1:10          | RbtHPXTIIITIVHOCI_c   | 1770 | <sup>331</sup> GGYTLVNGY <sup>Cl</sup> PK <sup>341</sup>          |
|                 |                              | tBuOOH 1:2.5       | RbtHPXTIIITIVtBu_b    | 2685 | <sup>200</sup> YY <sup>tBu</sup> CFQGNQFLR <sup>210</sup>         |
|                 |                              | tBuOOH 1:1         | RbtHPXTIIITIVtBu_a    | 1766 | <sup>228</sup> DY <sup>tBu</sup> FLSCPGR <sup>236</sup>           |
| Table IV        | Rabbit                       | HOCI 1:10          | RbtHPXTIIITIVHOCI1_c  | 3392 | <sup>211</sup> FNPVSGEVPPGY <sup>di-Cl</sup> PLDVR <sup>227</sup> |
|                 |                              | HOCI 1:10          | RbtHPX TIIITIVHOCI1_c | 1489 | <sup>228</sup> DY <sup>Cl</sup> FLSCPGR <sup>236</sup>            |
|                 |                              | HOCI 1:10          | RbtHPX TIIITIVHOCI1_c | 1682 | <sup>228</sup> DY <sup>di-Cl</sup> FLSCPGR <sup>236</sup>         |
|                 |                              | tBuOOH 1:1         | RbtHPX TIIITIVtBu_a   | 3776 | <sup>211</sup> FNPVSGEVPPGY <sup>tBu</sup> PLDVR <sup>227</sup>   |
|                 |                              | tBuOOH 1:2.5       | RbtHPX TIIITIVtBu_b   | 3543 | <sup>211</sup> FNPVSGEVPPGY <sup>tBu</sup> PLDVR <sup>227</sup>   |
|                 |                              | tBuOOH 1:10        | RbtHPXTIVtBu_c        | 4021 | <sup>211</sup> FNPVSGEVPPGY <sup>tBu</sup> PLDVR <sup>227</sup>   |
| Figure 1        | Human                        | native             | HuHPXTIF1FS3Yn199     | 2173 | <sup>198</sup> YY <sup>n</sup> CFQGNQFLR <sup>208</sup>           |
| Figure 3        | Human                        | N/MPO/GO t=0 a     | HuHPXF3t0aYn119       |      | <sup>198</sup> YY <sup>n</sup> CFQGNQFLR <sup>208</sup>           |
|                 |                              | N/MPO/GO t=0 b     | HuHPXF3t0bYn119       |      |                                                                   |
|                 |                              | N/MPO/GO t=0 c     | HuHPXF3t0cYn119       |      |                                                                   |
|                 |                              | N/MPO/GO t=5min a  | HuHPXF3t5aYn119       |      |                                                                   |
|                 |                              | N/MPO/GO t=5min b  | HuHPXF3t5bYn119       |      |                                                                   |
|                 |                              | N/MPO/GO t=5min c  | HuHPXF3t5cYn119       |      |                                                                   |
|                 |                              | N/MPO/GO t=10min a | HuHPXF3t10aYn119      |      |                                                                   |
|                 |                              | N/MPO/GO t=10min b | HuHPXF3t10bYn119      |      |                                                                   |
|                 |                              | N/MPO/GO t=10min c | HuHPXF3t10cYn119      |      |                                                                   |
|                 |                              | N/MPO/GO t=15min a | HuHPXF3t15aYn119      |      |                                                                   |
|                 |                              | N/MPO/GO t=15min b | HuHPXF3t15bYn119      |      |                                                                   |
|                 |                              | N/MPO/GO t=15min c | HuHPXF3t15cYn119      |      |                                                                   |
|                 |                              | N/MPO/GO t=30min a | HuHPXF3t30aYn119      |      |                                                                   |
|                 |                              | N/MPO/GO t=30min b | HuHPXF3t30bYn119      |      |                                                                   |
|                 |                              | N/MPO/GO t=30min c | HuHPXF3t30cYn119      |      |                                                                   |
|                 |                              | N/MPO/GO t=1h a    | HuHPXF3t1haYn119      |      |                                                                   |
|                 |                              | N/MPO/GO t=1h b    | HuHPXF3t1hbYn119      |      |                                                                   |
|                 |                              | N/MPO/GO t=1h c    | HuHPXF3t1hcYn119      |      |                                                                   |
|                 |                              | N/MPO/GO t=2h a    | HuHPXF3t2haYn119      |      |                                                                   |
|                 |                              | N/MPO/GO t=2h b    | HuHPXF3t2hbYn119      |      |                                                                   |
| N/MPO/GO t=2h c | HuHPXF3t2hcYn119             |                    |                       |      |                                                                   |
| Figure S1       | Rabbit                       |                    | RbtHPXTITIIIFS1Yn201  | 3037 | YY <sup>n</sup> CFQGNQFLR                                         |
| Figure S2       | Rat                          |                    | RatHPXTIIFS2Y118t     | 711  | YY <sup>n</sup> CFQGNQFLR                                         |
| Figure S3       | Human                        |                    | HuHPXTIF1FS3Yn199     | 2173 | YY <sup>n</sup> CFQGNQFLR                                         |
| Figure S4       | Human Std curve <sup>a</sup> | 10μM a             | HuHPXFS410a           |      |                                                                   |
|                 |                              | 10μM b             | HuHPXFS410b           |      |                                                                   |
|                 |                              | 10μM c             | HuHPXFS410c           |      |                                                                   |
|                 |                              | 20μM a             | HuHPXFS420a           |      |                                                                   |

|        |             |
|--------|-------------|
| 20μM b | HuHPXFS420b |
| 20μM c | HuHPXFS420c |
| 30μM a | HuHPXFS430a |
| 30μM b | HuHPXFS430b |
| 30μM c | HuHPXFS430c |
| 40μM a | HuHPXFS440a |
| 40μM b | HuHPXFS440b |
| 40μM c | HuHPXFS440c |
| 50μM a | HuHPXFS450a |
| 50μM b | HuHPXFS450b |
| 50μM c | HuHPXFS450c |
| 60μM a | HuHPXFS460a |
| 60μM b | HuHPXFS460b |
| 60μM c | HuHPXFS460c |
| 70μM a | HuHPXFS470a |
| 70μM b | HuHPXFS470b |
| 70μM c | HuHPXFS470c |
| 80μM a | HuHPXFS480a |
| 80μM b | HuHPXFS480b |
| 80μM c | HuHPXFS480c |
| 90μM a | HuHPXFS490a |
| 90μM b | HuHPXFS490b |
| 90μM c | HuHPXFS490c |

---

**Supplemental Table I. File names for the MS/MS analyses of peptides derived from human, rabbit and rat hemopexin deposited via the MassIVE partner repository.** <sup>†</sup>Treatments: HOCl 1:10 (file code HOCl\_c); tBuOOH 1:1, 1:2.5 or 1:10 (files codes tBu\_a, \_b and \_c, respectively).

<sup>a</sup>Celtek peptides for standard curve: each file name corresponds to data for each concentration of 1mM stock peptide (indicated) of native YYCFQGNQFLR and nitrated YY<sup>14</sup>CFQGNQFLR peptides with 2 reference NFPSVDAAFR peptide samples (carried out in triplicate: a,b,c).

**SUPPLEMENTAL FIGURES**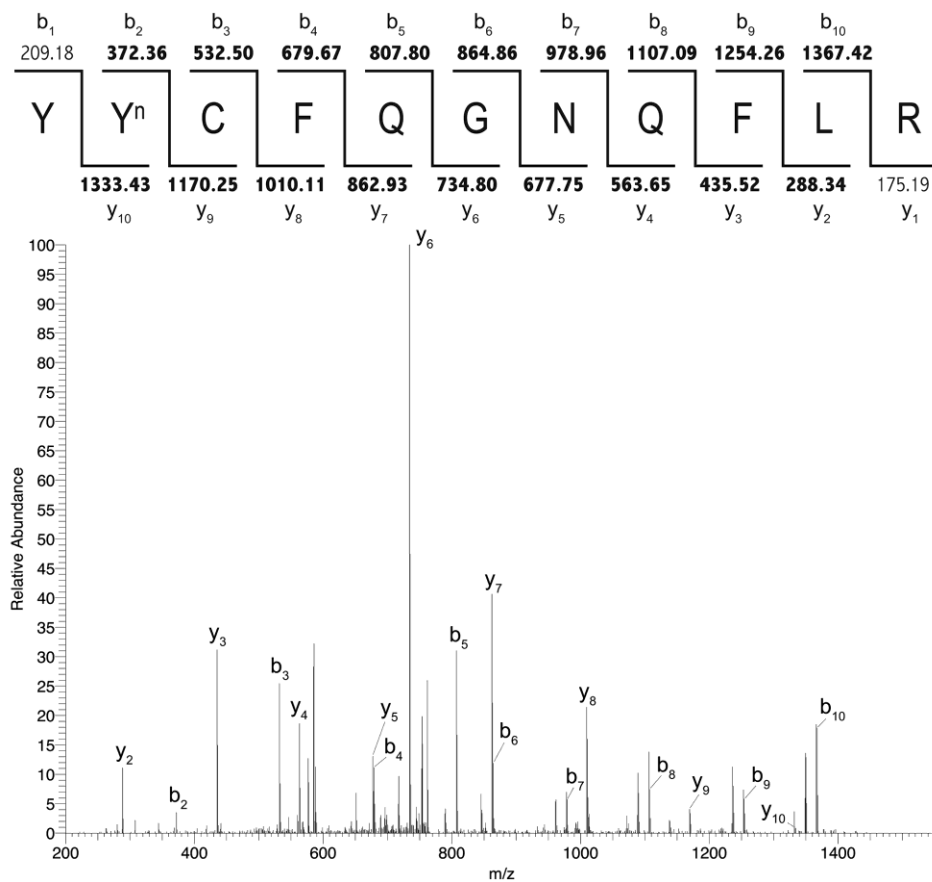

**Figure S1. Nitration of rabbit hemopexin occurs *in vivo* at Y<sub>201</sub>.** Tyrosine nitration was detected by LC-MS/MS analysis of hemopexin isolated from rabbit plasma. Xcalibur BioWorks was used to identify Y<sup>n</sup><sub>201</sub> on the tryptic peptide YY<sup>n</sup>CFQGNQFLR (see Table I for XCorr value). Matched b and y ions are shown in bold in the ions diagram (above) and are indicated next to corresponding peaks in the MS/MS spectrum.

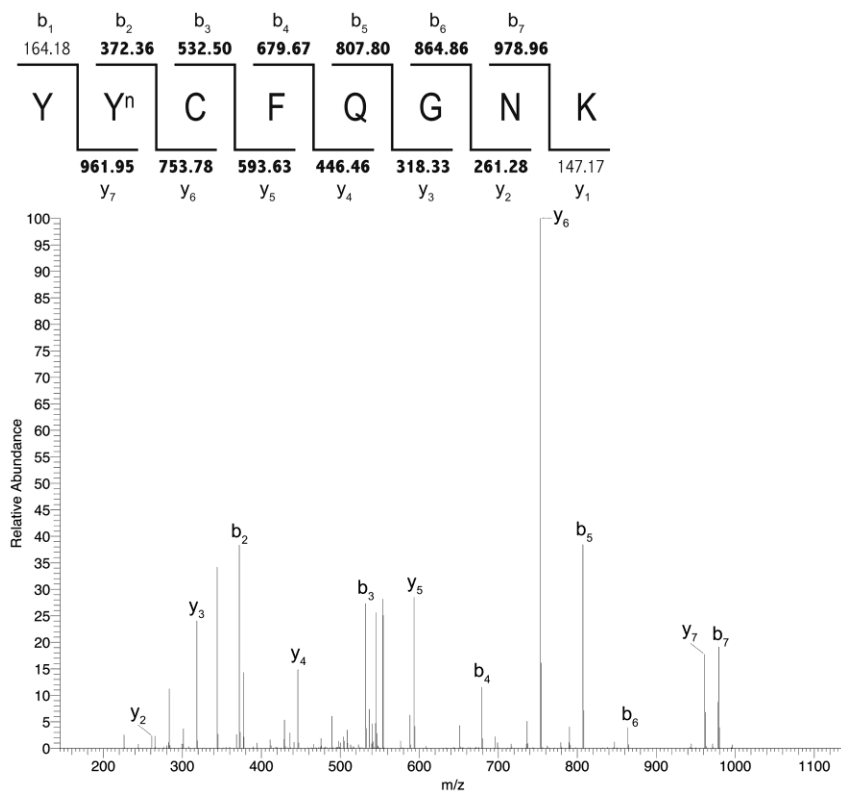

**Figure S2. Nitration of rat hemopexin occurs *in vivo* at Y118.**

Tyrosine nitration was detected by LC-MS/MS analysis of hemopexin isolated from rat plasma. Xcalibur BioWorks was used to identify Y<sup>n</sup>118 on the tryptic peptide YY<sup>n</sup>CFQGNQFLR (see Table I for XCorr value). Matched b and y ions are shown in bold in the ions diagram (above) and are indicated next to corresponding peaks in the MS/MS spectrum.

| #  | b         | b <sup>++</sup> | b*        | b* <sup>++</sup> | Seq. | y         | y <sup>++</sup> | y*        | y* <sup>++</sup> | #  |
|----|-----------|-----------------|-----------|------------------|------|-----------|-----------------|-----------|------------------|----|
| 1  | 164.0706  | 82.5389         |           |                  | Y    |           |                 |           |                  | 11 |
| 2  | 372.1190  | 186.5631        |           |                  | Y    | 1377.6004 | 689.3039        | 1360.5739 | 680.7906         | 10 |
| 3  | 532.1497  | 266.5785        |           |                  | C    | 1169.5520 | 585.2797        | 1152.5255 | 576.7664         | 9  |
| 4  | 679.2181  | 340.1127        |           |                  | F    | 1009.5214 | 505.2643        | 992.4948  | 496.7511         | 8  |
| 5  | 807.2767  | 404.1420        | 790.2501  | 395.6287         | Q    | 862.4530  | 431.7301        | 845.4264  | 423.2169         | 7  |
| 6  | 864.2981  | 432.6527        | 847.2716  | 424.1394         | G    | 734.3944  | 367.7008        | 717.3679  | 359.1876         | 6  |
| 7  | 978.3410  | 489.6742        | 961.3145  | 481.1609         | N    | 677.3729  | 339.1901        | 660.3464  | 330.6768         | 5  |
| 8  | 1106.3996 | 553.7034        | 1089.3731 | 545.1902         | Q    | 563.3300  | 282.1686        | 546.3035  | 273.6554         | 4  |
| 9  | 1253.4680 | 627.2377        | 1236.4415 | 618.7244         | F    | 435.2714  | 218.1394        | 418.2449  | 209.6261         | 3  |
| 10 | 1366.5521 | 683.7797        | 1349.5256 | 675.2664         | L    | 288.2030  | 144.6051        | 271.1765  | 136.0919         | 2  |
| 11 |           |                 |           |                  | R    | 175.1190  | 88.0631         | 158.0924  | 79.5498          | 1  |

Figure S3. MASCOT search results for nitration of human hemopexin *in vivo*.

The results of a recent MASCOT search of the same data file (05Dec1316.RAW and scan (2173), which identified the same peptide YY<sup>n</sup>CFQGNQFLR. The monoisotopic mass of the neutral peptide is 1539.6565 Da.

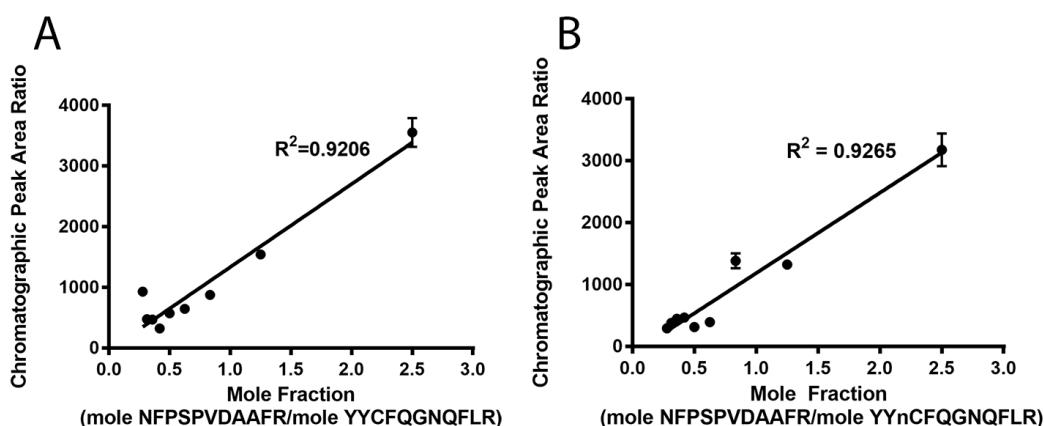

Figure S4. Calibration curves to determine the mole fraction of *in-vitro* nitrated Y<sup>199</sup> in human hemopexin over the period of 120 minutes incubation with the myeloperoxidase/glucose oxidase system for the *in vitro* nitration of proteins.

The time course of nitration using SRM data were quantitated using the chromatographic peak areas of the modified peptide at each time point were corrected by the reference peptide. Calibration curves for the analysis of (A) YYCFQGNQFLR and (B) YY<sup>n</sup>CFQGNQFLR peptides. Response ratios were obtained from calibration curves made with HPLC-purified, synthetic peptide standards. Stock solutions of each peptide were standardized with an assay for free amine groups using the amino acid arginine as the primary standard. These calibration curves allow the chromatographic peak area ratios determined in the LC/tandem MS analyses to be converted into mole fraction values for evaluating the stoichiometry of the reaction as shown in figure 3D.
